# Supplementary material for: A portable and autonomous multichannel fluorescence detector for on-line and in situ explosive detection in aqueous phase
Source: Royal Society of Chemistry journal article supplement (doi:10.1039/c2lc40804j), 2012-01-01
Supplement: c2lc40804j.pdf [file c2lc40804j.pdf]

## Supplementary Materials

*for*

### **A portable and autonomous multichannel fluorescence detector for on-line and in situ explosive detection in aqueous phase**

Yunhong Xin,<sup>\*a</sup> Qi Wang,<sup>a</sup> Taihong Liu,<sup>b</sup> Lingling Wang,<sup>a</sup> Jia Li,<sup>b</sup> and Yu Fang<sup>\*b</sup>

<sup>a</sup> School of Physics and Information Technology, Shaanxi Normal University, Xi'an 710062,  
P. R. China. E-mail: xinyh@snnu.edu.cn

<sup>b</sup> Key Laboratory of Applied Surface and Colloid Chemistry (Shaanxi Normal University),  
Ministry of Education, School of Chemistry and Chemical Engineering, Shaanxi Normal  
University, Xi'an 710062, P. R. China. E-mail: yfang@snnu.edu.cn

## Table Captions

**Table S1.** Parameters of the LED adopted

**Table S2.** Parameters of the optical filter adopted

**Table S3.** Experimental data employed for the classification of NB

**Table S4.** Experimental data employed for the classification of PA

**Table S5.** Experimental data employed for the classification of TNT

**Table S6.** Experimental data employed for the classification of DNT

## Figure Legends

**Fig. S1** Photograph of the print circuit board (PCB) of the wireless communication module based on the chip CC2530

**Fig. S2** Photograph of the PCB of wireless communication module based on the chip CC2531

**Fig. S3** The complete interface of the control panel

**Fig. S4** Experimental results from the interference test of 9,10-anthraquinone (100  $\mu\text{M}$ ) and 1,2,5,8-tetrahydroxy-9,10-anthracenedione (100  $\mu\text{M}$ ) to the fluorescence emissions of the five film sensors.

**Table S1.** Parameters of the LED adopted

| Channel No. | LED Type*   | Manufactory         | Parameter (nm) |
|-------------|-------------|---------------------|----------------|
| 1           | YCL-365a    | Shenzhen            | 360-370        |
| 2           | YCL-365a    |                     | 360-370        |
| 3           | YCL-365a    | Yuanchuang          | 360-370        |
| 4           | YCL-400-405 | Electronic Co. Ltd, | 390-420        |
| 5           | YCL-480-485 | China               | 470-500        |

\* Note: Although the maximum excitation wavelengths of the fluorescent sensing films appear at 346 nm, 353 nm, 370 nm, 397 nm, and 497 nm, respectively, to produce and debug convenience, only three types of the LED have been used. In fact, with the compensation of the gain of the signal amplifier, these changes show little effect to the performance of the device.

**Table S2.** Parameters of the optical filter adopted

| Channel No. | Filter Input* | Filter Output* | Manufactory    |
|-------------|---------------|----------------|----------------|
| 1           | 365/10/OD5    | 400/20/OD4,    |                |
| 2           | 365/10/OD5    | 410/20/OD4     | Hxd Optical    |
| 3           | 365/10/OD5    | 500/20/OD4     | Technology Co. |
| 4           | 400/10/OD5    | 520/20/OD4     | Ltd., China    |
| 5           | 480/10/OD5    | 600/20/OD4     |                |

\* Note: The central wavelengths of the input bandpass optical filters are exactly consistent with those of the LEDs adopted, and the central wavelengths of the output bandpass optical filters are approximately consistent with the maximum emission wavelengths of the fluorescent sensing films, which are 376 nm, 408 nm, 500 nm, 505 nm, and 600 nm, respectively.

**Table S3.** Experimental data employed for the classification of NB\*

| CN \ FM    | FM   |      |      |      |      |
|------------|------|------|------|------|------|
|            | 1    | 2    | 3    | 4    | 5    |
| 0 $\mu$ M  | 2045 | 2047 | 2062 | 2068 | 2041 |
| 10 $\mu$ M | 1923 | 558  | 2041 | 2028 | 2044 |
| 20 $\mu$ M | 1833 | 292  | 1993 | 2003 | 1971 |
| 30 $\mu$ M | 1702 | 176  | 1965 | 1963 | 1907 |
| 40 $\mu$ M | 1614 | 97   | 1928 | 1949 | 1743 |
| 50 $\mu$ M | 1576 | 24   | 1910 | 1934 | 1700 |
| 60 $\mu$ M | 1556 | 0    | 1909 | 1899 | 1633 |

**Table S4.** Experimental data employed for the classification of PA\*

| CN \ FM    | FM   |      |      |      |      |
|------------|------|------|------|------|------|
|            | 1    | 2    | 3    | 4    | 5    |
| 0 $\mu$ M  | 1992 | 2015 | 1972 | 2005 | 2005 |
| 10 $\mu$ M | 1357 | 1983 | 1357 | 2004 | 1779 |
| 20 $\mu$ M | 1040 | 1964 | 799  | 1980 | 1554 |
| 30 $\mu$ M | 798  | 1783 | 471  | 1972 | 1169 |
| 40 $\mu$ M | 629  | 1717 | 213  | 1995 | 1015 |
| 50 $\mu$ M | 490  | 1633 | 96   | 1990 | 852  |
| 60 $\mu$ M | 393  | 1447 | 0    | 1942 | 679  |

**Table S5.** Experimental data employed for the classification of TNT\*

| CN \ FM    | FM   |      |      |      |      |
|------------|------|------|------|------|------|
|            | 1    | 2    | 3    | 4    | 5    |
| 0 $\mu$ M  | 1406 | 1385 | 1408 | 1406 | 1401 |
| 10 $\mu$ M | 1067 | 1367 | 1368 | 726  | 1216 |
| 20 $\mu$ M | 707  | 1312 | 1362 | 474  | 949  |
| 30 $\mu$ M | 494  | 909  | 1291 | 305  | 821  |
| 40 $\mu$ M | 351  | 725  | 1291 | 171  | 560  |
| 50 $\mu$ M | 255  | 591  | 1232 | 67   | 428  |
| 60 $\mu$ M | 172  | 340  | 1216 | 0    | 319  |

**Table S6.** Experimental data employed for the classification of DNT\*

| CN \ FM    | FM  |     |     |     |     |
|------------|-----|-----|-----|-----|-----|
|            | 1   | 2   | 3   | 4   | 5   |
| 0 $\mu$ M  | 924 | 925 | 923 | 921 | 930 |
| 10 $\mu$ M | 831 | 911 | 829 | 758 | 834 |
| 20 $\mu$ M | 655 | 901 | 751 | 701 | 745 |
| 30 $\mu$ M | 493 | 757 | 719 | 679 | 626 |
| 40 $\mu$ M | 416 | 473 | 659 | 644 | 531 |
| 50 $\mu$ M | 327 | 289 | 473 | 571 | 477 |
| 60 $\mu$ M | 217 | 0   | 310 | 548 | 387 |

\*where, FM stands for number of sensing film and CN stands for concentration.

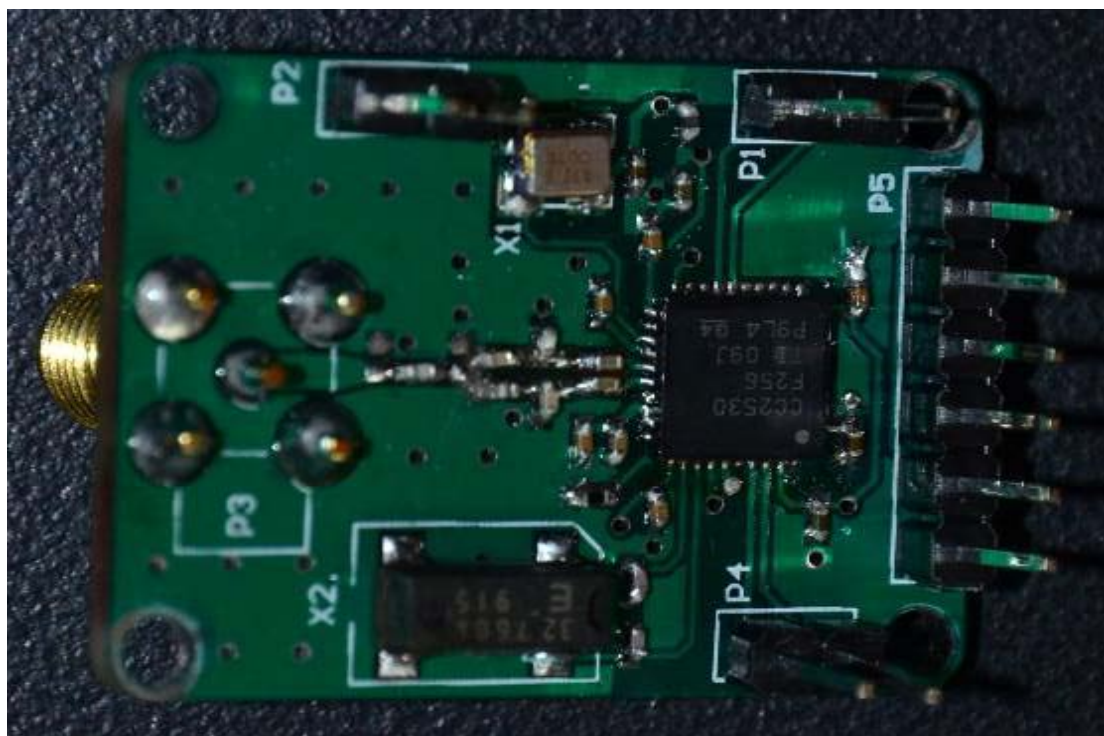

**Fig. S1** Photograph of the print circuit board (PCB) of wireless communication module based on the chip CC2530. The CC2530 is a true System-on-Chip (SoC) solution for IEEE 802.15.4, Zigbee applications. It enables robust network nodes to be built with very low total bill-of-material costs. The CC2530 combines the excellent performance of a leading RF transceiver with an industry-standard enhanced 8051 MCU, in-system programmable flash memory, 8-KB RAM, and many other powerful features. The CC2530 comes in four different flash versions: CC2530F32/64/128/256, with 32/64/128/256 KB of flash memory, respectively. The CC2530 has various operating modes, making it highly suitable for systems where ultralow power consumption is required. Short transition times between operating modes further ensure low energy consumption.

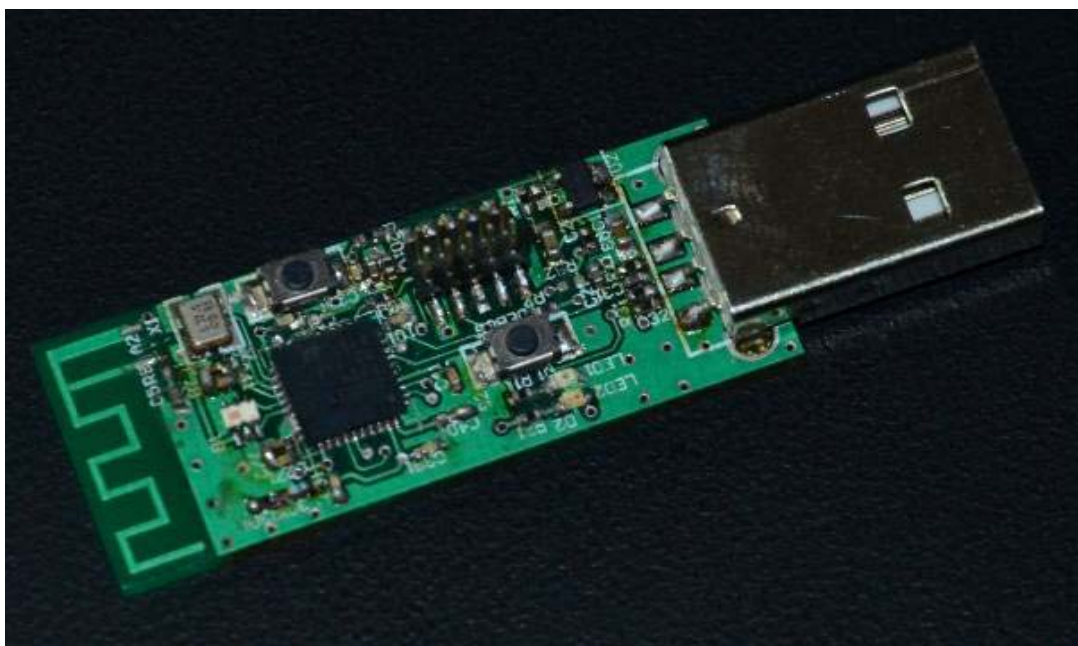

**Fig. S2** Photograph of the PCB of wireless communication module based on the chip CC2531. The chip CC2531 is identical to CC2530, with the addition of a built in full speed USB 2.0 compliant interface.

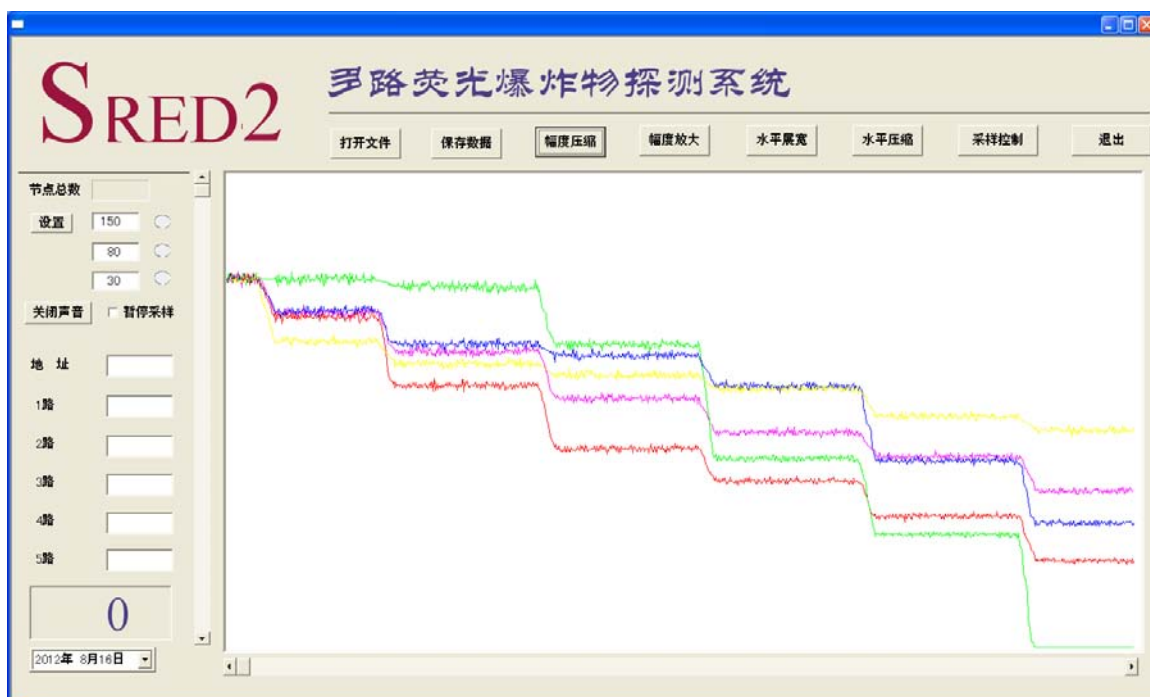

**Fig. S3** The complete interface of the control panel, where the five curves stand for the test results of five sensor channels. The seven steps in the curves correspond to the test results from samples of different concentrations: 0, 10, 20, 30, 40, 50, 60  $\mu\text{M}$ .

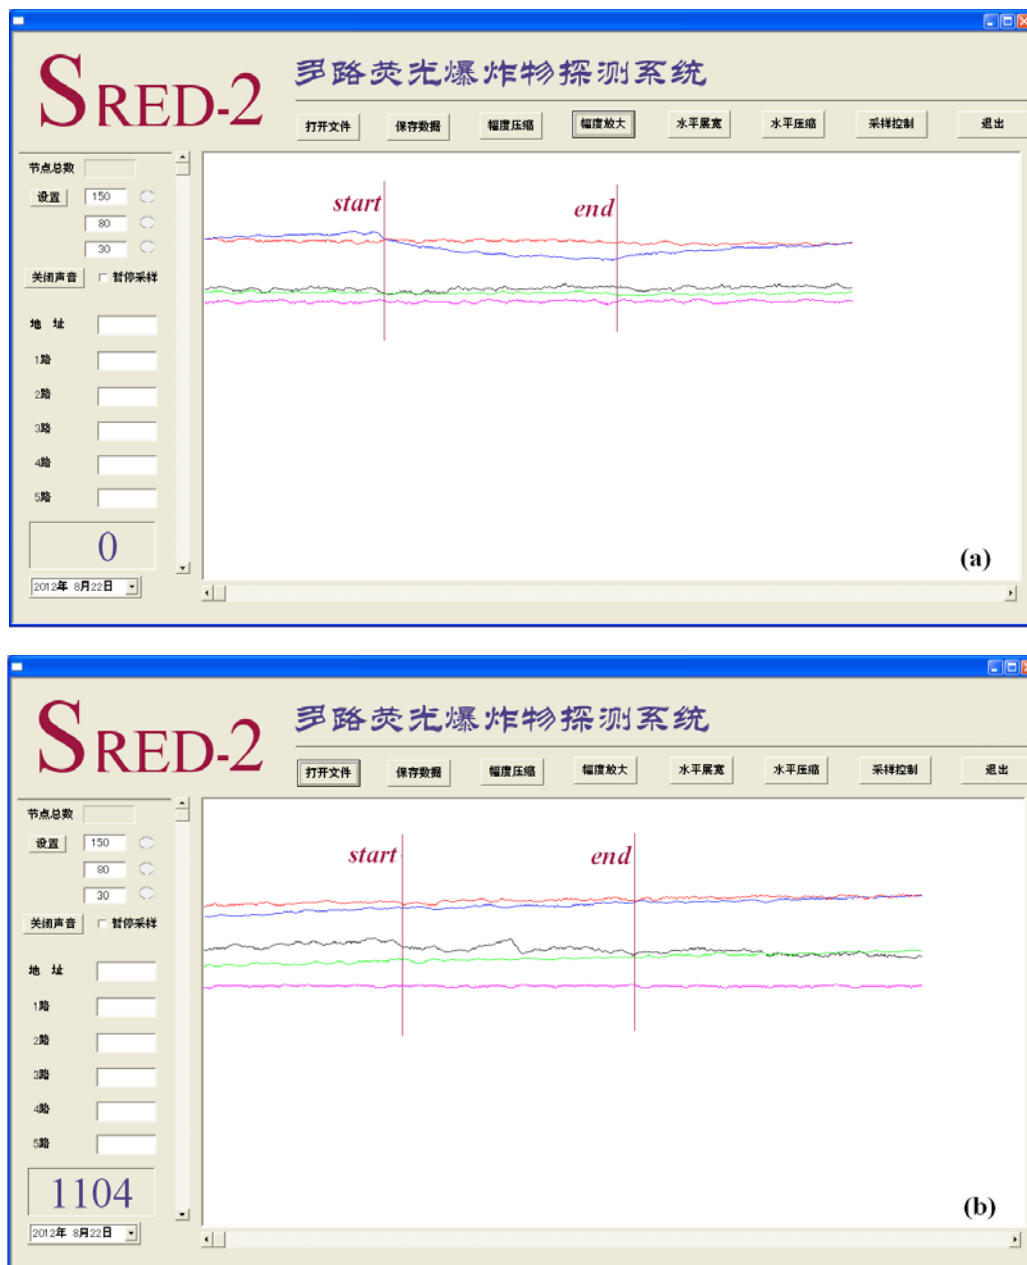

**Fig. S4** Experimental results from the interference test of 9,10-anthraquinone (100  $\mu\text{M}$ ) and 1,2,5,8-tetrahydroxy-9,10-anthracenedione (100  $\mu\text{M}$ ) to the fluorescence emissions of the five film sensors.

**Note:** Start in the two widows means at that point the interference was introduced, and the end means at which pure water was used instead of the interference solution. Clearly, all the sensors excepting the one in blue (a) show little response to the interference. As for the blue, the response is very weak if compared to that of the sensor to the nitroaromatic explosives (*c.f.* Figure 6 in the main text).
